# Supplementary material for: Estimated US Cancer Deaths Prevented With Increased Use of Lung, Colorectal, Breast, and Cervical Cancer Screening
Source: PubMed Central journal article supplement (PMC10665973; doi:10.1001/jamanetworkopen.2023.44698), 2023-11-22
Supplement: jamanetwopen-e2344698-s002.pdf [file jamanetwopen-e2344698-s002.pdf]

## Data Sharing Statement

Knudsen. Estimated US Cancer Deaths Prevented With Increased Use of Lung, Colorectal, Breast, and Cervical Cancer Screening. *JAMA Netw Open*. Published November 22, 2023. doi:10.1001/jamanetworkopen.2023.44698

### Data

**Data available:** Yes

**Data types:** Other (please specify)

**Additional Information:** The data used in this study were obtained from the published literature.

**How to access data:** The data used in this study were obtained from the published literature.

**When available:** With publication

### Supporting Documents

**Document types:** None

### Additional Information

**Who can access the data:** The data used in this study were obtained from the published literature and are therefore available to anyone.

**Types of analyses:** The data used in this study were obtained from the published literature and are therefore available to anyone for any purpose.

**Mechanisms of data availability:** The data used in this study were obtained from the published literature.
